# Supplementary material for: Is a treat-to-target strategy in osteoporosis applicable in clinical practice? Consensus among a panel of European experts
Source: Springer Nature journal article supplement (doi:10.1007/s00198-020-05569-9), 2020-08-07
Supplement: MOESM1 [file 18257392]

1 **Is a Treat-to-Target Strategy in Osteoporosis Applicable in**  
2 **Clinical Practice? A European Expert Consensus**

3 Thierry Thomas,<sup>1</sup> Enrique Casado,<sup>2</sup> Piet Geusens,<sup>3</sup> Willem F. Lems,<sup>4</sup> Jen  
4 Timoshanko,<sup>5</sup> Daniella Taylor,<sup>6</sup> Lorenz C. Hofbauer<sup>7</sup>

5 <sup>1</sup>CHU de St-Etienne, INSERM U1059, Université de Lyon, St-Etienne, France;

6 <sup>2</sup>University Hospital Parc Taulí, Sabadell, Spain; <sup>3</sup>Maastricht University, Maastricht,

7 The Netherlands and Hasselt University, Hasselt, Belgium; <sup>4</sup>Amsterdam University

8 Medical Center, location VUmc, Amsterdam, The Netherlands; <sup>5</sup>UCB Pharma, Slough,

9 UK; <sup>6</sup>Ogilvy Health, London, UK; <sup>7</sup>Center for Healthy Aging, Technische Universität

10 Dresden, Dresden, Germany

11

12 **Correspondence to:** Jen Timoshanko, [jen.timoshanko@ucb.com](mailto:jen.timoshanko@ucb.com)

13 **Short title:** Treat-to-Target Strategy in Osteoporosis

1 **SUPPLEMENTARY INFORMATION**

2

3 **Suppl. 1 Evolution of statements posed to Delphi panellists**

|                    | Survey 1                                                                                                                                               |                                                                                                                                                           | Survey 2                                                                                                                                                                                                                                                                                                                 |                                                          | Survey 3                                                                                    |                                       | Notes                                                                                                                                                                                                                                           |
|--------------------|--------------------------------------------------------------------------------------------------------------------------------------------------------|-----------------------------------------------------------------------------------------------------------------------------------------------------------|--------------------------------------------------------------------------------------------------------------------------------------------------------------------------------------------------------------------------------------------------------------------------------------------------------------------------|----------------------------------------------------------|---------------------------------------------------------------------------------------------|---------------------------------------|-------------------------------------------------------------------------------------------------------------------------------------------------------------------------------------------------------------------------------------------------|
|                    | Statement                                                                                                                                              | Results                                                                                                                                                   | Statement                                                                                                                                                                                                                                                                                                                | Results                                                  | Statement                                                                                   | Results                               |                                                                                                                                                                                                                                                 |
| <b>Statement 1</b> | The ultimate management goal for patients who have experienced a fragility fracture is to prevent further fragility fractures.                         | 10 strongly agree; 2 agree<br><br>Feedback that managing the prevalent fracture is also important                                                         | The two most important management goals for patients who have experienced a fragility fracture are to maximise recovery of pre-fracture functional level and to prevent new fractures.                                                                                                                                   | 12 strongly agree<br><br>No further refinement necessary | NA                                                                                          | NA                                    | Consensus reached in Survey 1, but refinement based on participant comments allowed the strength of consensus to be increased                                                                                                                   |
| <b>Statement 2</b> | In addition to a clear clinical treatment target, agreeing on individualised management goals with each patient would have value in clinical practice. | 9 strongly agree; 1 agree; 1 disagree; 1 strongly disagree<br><br>Sentiment of statement encompassed by Statement 6 (Survey 1) and Statement 2 (Survey 3) | The preservation of independence is the most important treatment goal for patients with fragility fracture reflecting freedom from fractures and can be measured by physical function/activity of daily living (ADL). Another important management goal is achievement of treatment adherence targets, although specific | 6 strongly agree; 4 agree; 2 disagree                    | Specific treatment goals should be determined by patients' individual problems or concerns. | 9 strongly agree; 2 agree; 1 disagree | Consensus reached on Survey 1, but to prevent repetition of Statement 6 and also based on participant comments on the treatment goals posed in Survey 2, the original statement was refined, allowing the strength of consensus to be increased |
| <b>Statement 3</b> | Exploratory questions                                                                                                                                  |                                                                                                                                                           |                                                                                                                                                                                                                                                                                                                          |                                                          | The preservation of independence is often the most                                          | 6 strongly agree; 6 agree             | Consensus reached in Survey 2, but refinement based                                                                                                                                                                                             |

Treat-to-Target Strategy in Osteoporosis – Suppl 1

|                    | Survey 1              |         | Survey 2                                                                                                                                                                                          |                                                                                                                                                   | Survey 3                                                                                                                                                                                         |                            | Notes                                                                                                                            |
|--------------------|-----------------------|---------|---------------------------------------------------------------------------------------------------------------------------------------------------------------------------------------------------|---------------------------------------------------------------------------------------------------------------------------------------------------|--------------------------------------------------------------------------------------------------------------------------------------------------------------------------------------------------|----------------------------|----------------------------------------------------------------------------------------------------------------------------------|
|                    | Statement             | Results | Statement                                                                                                                                                                                         | Results                                                                                                                                           | Statement                                                                                                                                                                                        | Results                    |                                                                                                                                  |
|                    |                       |         | goals should be determined by patients' individual problems or concerns.                                                                                                                          |                                                                                                                                                   | important treatment goal for patients with fragility fracture, reflecting freedom from fractures. It can be measured, for example, by physical function and activities of daily living (ADL).    |                            | on participant comments and splitting the statement into clear, separate ideas allowed the strength of consensus to be increased |
| <b>Statement 4</b> | Exploratory questions |         |                                                                                                                                                                                                   |                                                                                                                                                   | Treatment adherence is an important means to achieve treatment goals including freedom from fractures and, consequently, preservation of patient independence.                                   | 10 strongly agree; 2 agree |                                                                                                                                  |
| <b>Statement 5</b> | Exploratory questions |         | The ideal approach to achieve management goals for fragility fracture is to set a treatment target with patients and make therapeutic decisions based on the probability of reaching that target. | 2 strongly agree; 9 agree; 1 unable to answer<br><br>Feedback that the word 'ideal' should be replaced with 'best' to relate to clinical practice | The best approach to achieve management goals for fragility fracture is to set a treatment target with patients and make therapeutic decisions based on the probability of reaching that target. | 10 strongly agree; 2 agree | Consensus reached in Survey 2, but refinement based on participant comments allowed the strength of consensus to be increased    |

Treat-to-Target Strategy in Osteoporosis – Suppl 1

|                    | Survey 1                                                                                                                      |                                                                                  | Survey 2              |         | Survey 3                                                                                                                                                                                                                                                 |                                               | Notes                                         |
|--------------------|-------------------------------------------------------------------------------------------------------------------------------|----------------------------------------------------------------------------------|-----------------------|---------|----------------------------------------------------------------------------------------------------------------------------------------------------------------------------------------------------------------------------------------------------------|-----------------------------------------------|-----------------------------------------------|
|                    | Statement                                                                                                                     | Results                                                                          | Statement             | Results | Statement                                                                                                                                                                                                                                                | Results                                       |                                               |
| <b>Statement 6</b> | A treatment target that represents achievement of an acceptable level of fracture risk would have value in clinical practice. | 8 strongly agree; 3 agree; 1 disagree<br><br>No option for refinement identified | NA                    | NA      | NA                                                                                                                                                                                                                                                       | NA                                            | None                                          |
| <b>Statement 7</b> | Exploratory questions                                                                                                         |                                                                                  | Exploratory questions |         | A single overarching treatment target of low fracture risk can be established for most post-fracture patients and would require different approaches to achieve; however, this will not be feasible for some patients who require a personalised target. | 6 strongly agree; 5 agree; 1 unable to answer | New statement derived from Survey 2 responses |
| <b>Statement 8</b> | Exploratory questions                                                                                                         |                                                                                  | Exploratory questions |         | Truly goal-directed treatment plans, which best work towards the overall goal of fracture prevention and achieve the BMD treatment target, will require more potent therapies                                                                            | 8 strongly agree; 4 agree                     | New statement derived from Survey 2 responses |

Treat-to-Target Strategy in Osteoporosis – Suppl 1

|                     | Survey 1                                                                                                                                                                               |                                                                      | Survey 2                                                                                                                     |                                           | Survey 3                                                                                                                                                                                                 |                                                           | Notes                                                      |
|---------------------|----------------------------------------------------------------------------------------------------------------------------------------------------------------------------------------|----------------------------------------------------------------------|------------------------------------------------------------------------------------------------------------------------------|-------------------------------------------|----------------------------------------------------------------------------------------------------------------------------------------------------------------------------------------------------------|-----------------------------------------------------------|------------------------------------------------------------|
|                     | Statement                                                                                                                                                                              | Results                                                              | Statement                                                                                                                    | Results                                   | Statement                                                                                                                                                                                                | Results                                                   |                                                            |
|                     |                                                                                                                                                                                        |                                                                      |                                                                                                                              |                                           | than are currently available.                                                                                                                                                                            |                                                           |                                                            |
| <b>Statement 9</b>  | There is a need for practical guidance on how to use different treatments in patients with fragility fracture, including in what sequence, with what aim/target and in which patients. | 9 strongly agree; 3 agree<br><br>No option for refinement identified | NA                                                                                                                           | NA                                        | NA                                                                                                                                                                                                       | NA                                                        | None                                                       |
| <b>Statement 10</b> | Exploratory questions                                                                                                                                                                  |                                                                      | Exploratory questions                                                                                                        |                                           | Bone mineral density (BMD), assessed via DXA scan, is the best available surrogate of fracture risk and therefore the most clinically appropriate treatment target for most fragility fracture patients. | 7 strongly agree; 4 agree; 1 disagree                     | New statement derived from Survey 1 and Survey 2 responses |
| <b>Statement 11</b> | Exploratory questions                                                                                                                                                                  |                                                                      | Please select the specific BMD T-score below you believe to be the most clinically appropriate treatment target (i.e. can be | 3 (-2.5); 5 (-2); 4 (between -1 and -1.5) | The target T-score should be set at a level associated with no increase in risk of fracture (e.g. between -2.5 and -1.0 at the total hip),                                                               | 3 strongly agree; 6 agree; 1 disagree; 2 unable to answer | New statement derived from Survey 2 responses              |

Treat-to-Target Strategy in Osteoporosis – Suppl 1

|                     | Survey 1              |         | Survey 2                                                                                                                                                                                  |                                                                                                                                    | Survey 3                                                                                                                                                 |                                       | Notes                                         |
|---------------------|-----------------------|---------|-------------------------------------------------------------------------------------------------------------------------------------------------------------------------------------------|------------------------------------------------------------------------------------------------------------------------------------|----------------------------------------------------------------------------------------------------------------------------------------------------------|---------------------------------------|-----------------------------------------------|
|                     | Statement             | Results | Statement                                                                                                                                                                                 | Results                                                                                                                            | Statement                                                                                                                                                | Results                               |                                               |
|                     |                       |         | established for most patients).                                                                                                                                                           |                                                                                                                                    | depending on what is feasible for the patient to achieve.                                                                                                |                                       |                                               |
| <b>Statement 12</b> | Exploratory questions |         | The timepoint at which to assess whether the treatment target has been achieved (e.g. after n years of treatment) should be established after starting treatment, on an individual basis. | 4 strongly agree; 6 agree; 2 disagree - no option for further refinement identified                                                | NA                                                                                                                                                       | NA                                    | New statement derived from Survey 1 responses |
| <b>Statement 13</b> | Exploratory questions |         | Please select the frequency of BMD monitoring you believe to be the most clinically appropriate.                                                                                          | 1 (1–2 years); 1 (18–24 months); 7 (2–3 years); 3 (individualised)<br><br>Comments indicated that it varies depending on treatment | The frequency of BMD monitoring is dependent on the type of treatment (e.g. every 2–3 years for antiresorptives and yearly for bone-forming treatments). | 6 strongly agree; 4 agree; 2 disagree | New statement derived from Survey 2 responses |

1 ADL: activities of daily living; BMD: bone mineral density; DXA: dual-energy X-ray absorptiometry; NA: not applicable
